# Supplementary material for: An efficient pink luminescent Eu(iii) coordination polymer excited on a blue LED chip
Source: Royal Society of Chemistry journal article supplement (doi:10.1039/d3tc00215b), 2023-01-01
Supplement: d3tc00215b1.pdf [file d3tc00215b1.pdf]

# Efficient Pink Luminescent Eu(III) Coordination Polymer Excited on Blue LED Chip

Nafisa A. Abusail,<sup>a</sup> Najat Al Riyami, Rashid Ilmi<sup>a</sup>, Muhammed S. Khan<sup>a</sup> and Nawal K. Al-Rasbi<sup>a\*</sup>

<sup>a</sup>Dept. of Chemistry, College of Science, Sultan Qaboos University, Al- Khode 123, OMAN, Fax: +968  
24141469, E-mail: [nrasbi@squ.edu.om](mailto:nrasbi@squ.edu.om)

(a)

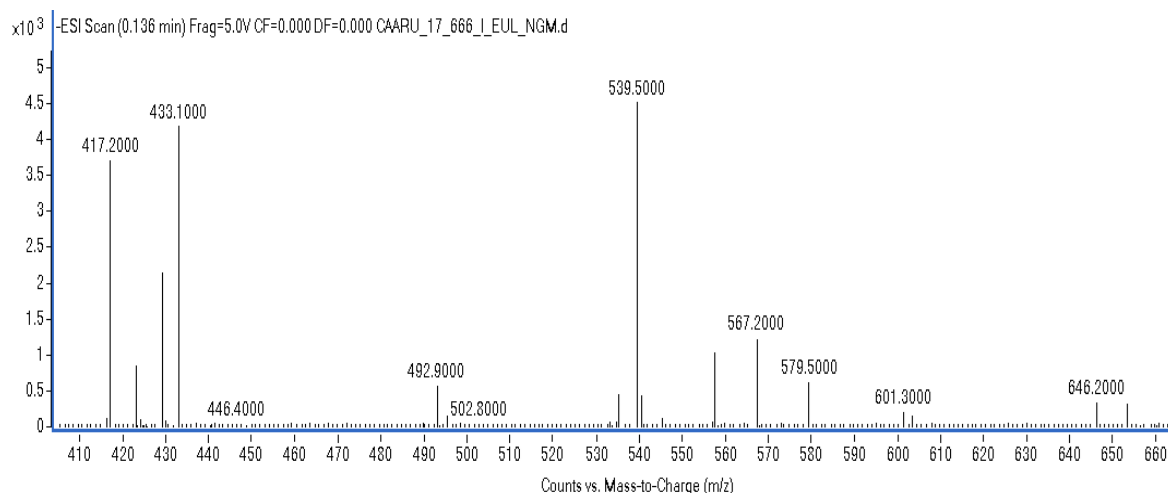

(b)

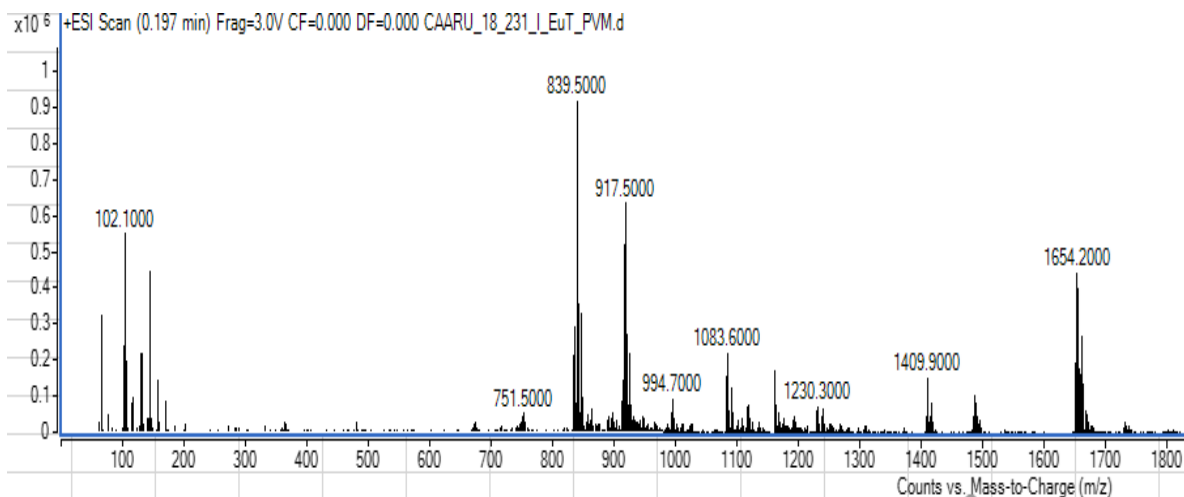

**Figure S1:** ESI-Mass spectra of (a) **Eu1** and (b) **Eu2** polymers.

**(a)**

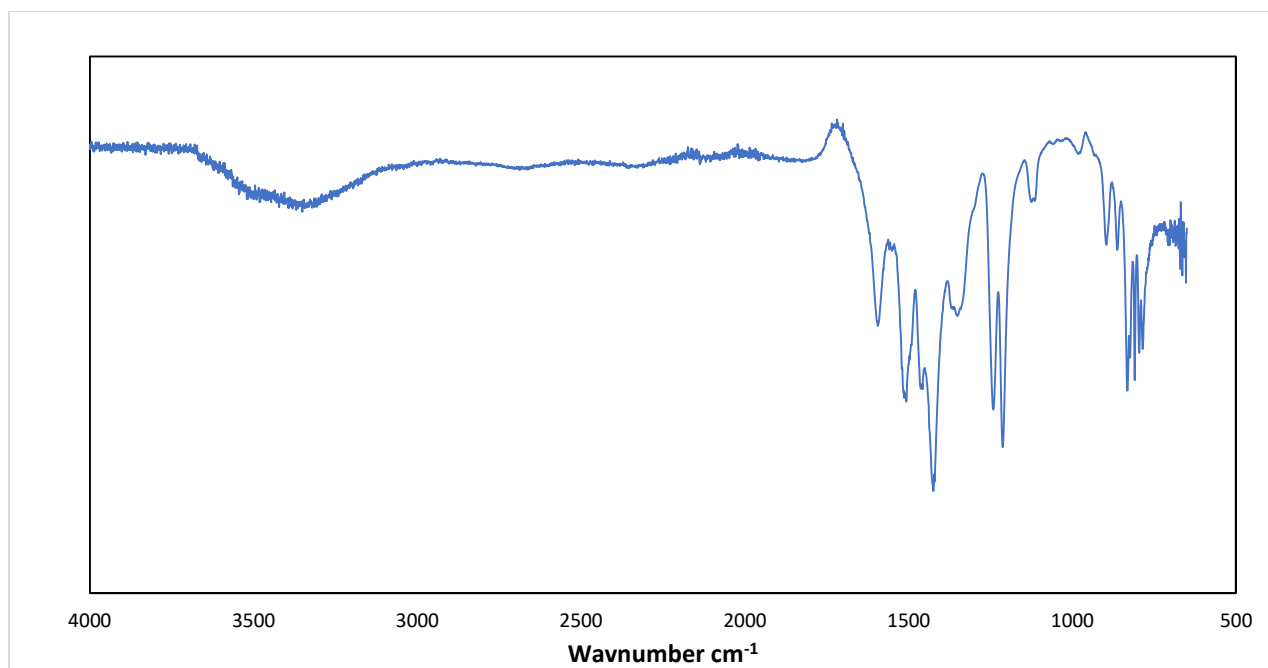

**(b)**

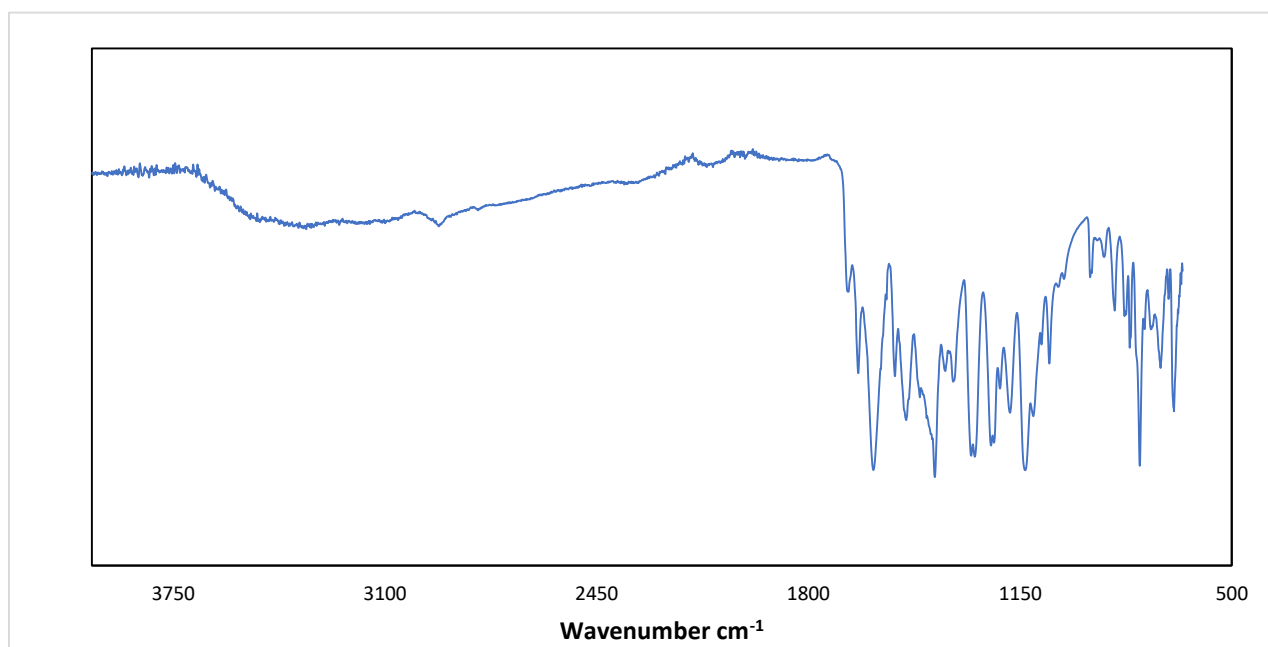

**Figure S2:** The solid-state FTIR Spectra of (a) **Eu1** and (b) **Eu2** polymers.

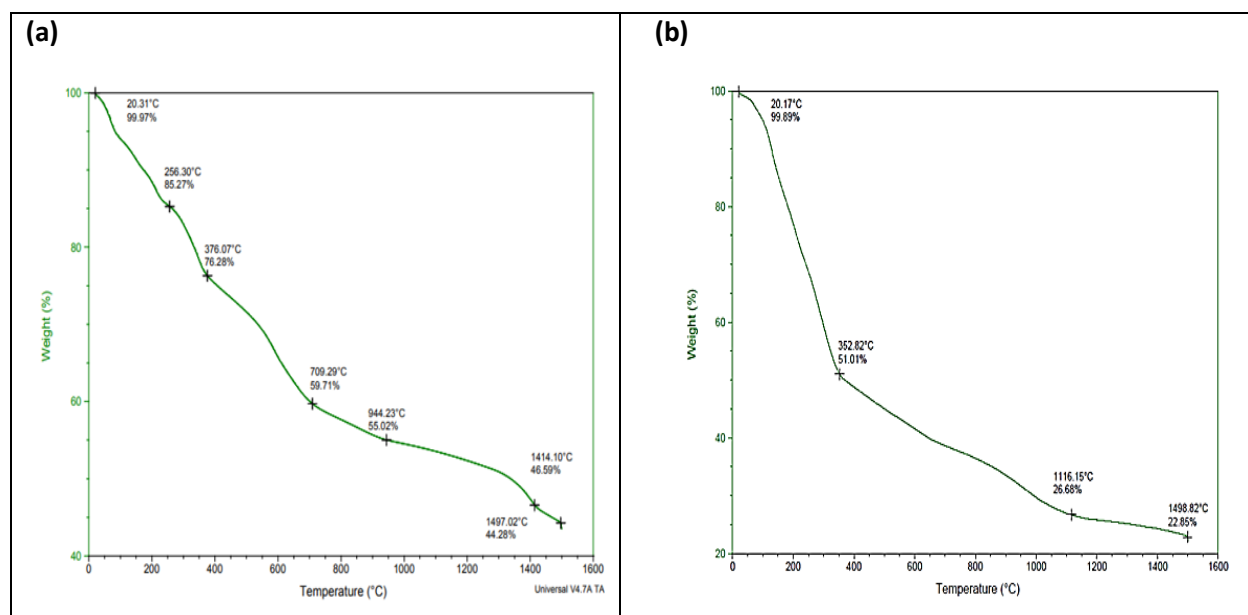

**Figure S3:** TGA curves of (a) **Eu1** and (b) **Eu2** recorded under an inert atmosphere of N<sub>2</sub>.

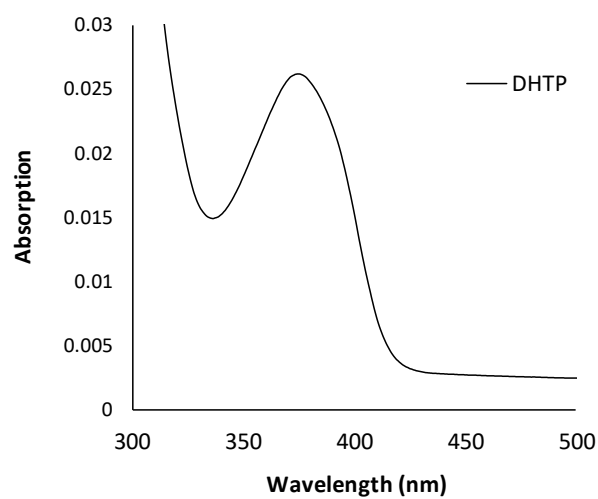

**Figure S4:** The UV/Vis absorption spectrum of DHTP in THF ( $1 \times 10^{-5}$  M) at 298 K.

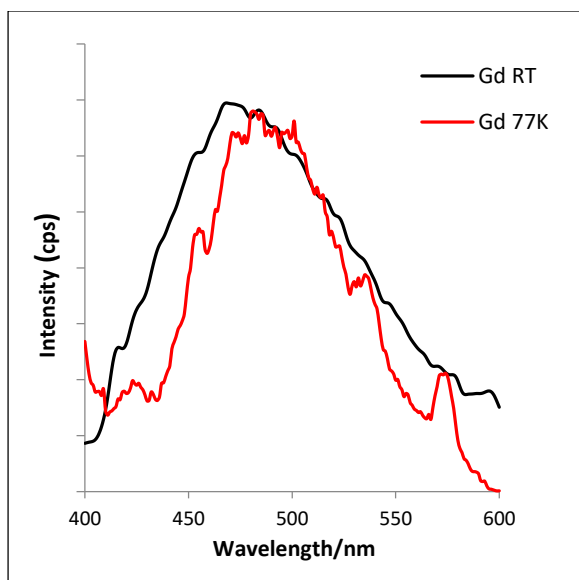

**Figure S5:** The luminescence Spectre of **Gd1 CP** in ethanol ( $1 \times 10^{-5}$  M) at 300 K and 77 K.

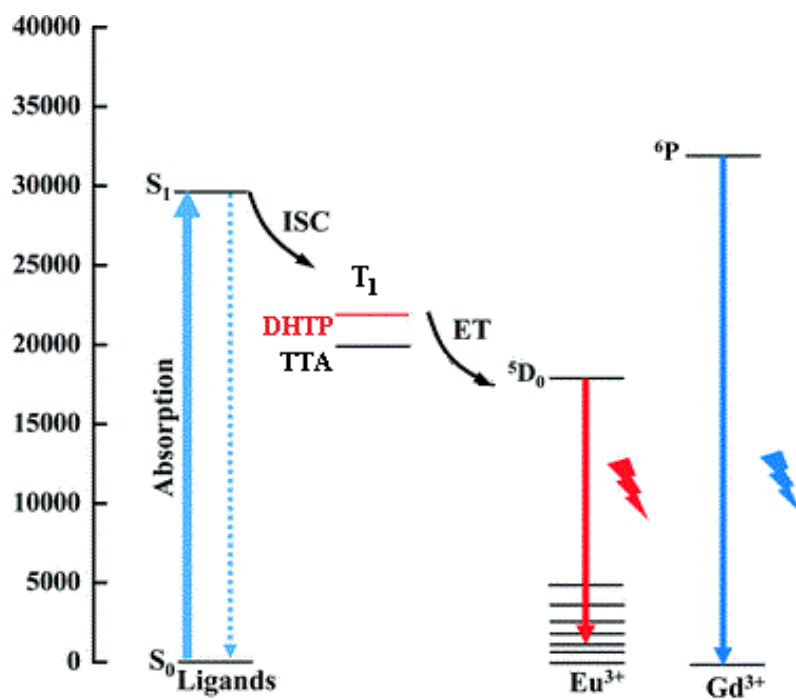

**Scheme S6:** Representation of the energy transfer pathways from DHTP and TTA to the Eu(III) and Gd(III) centres.

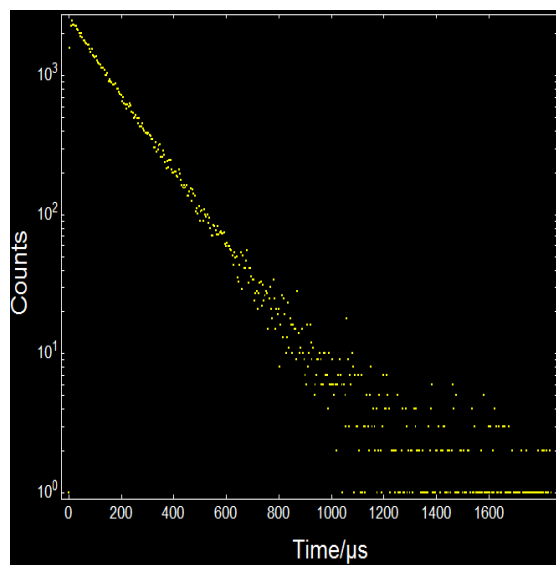

**Figure S7:** The luminescence decay of Eu(III) in **Eu2** CP in the solid state at RT.

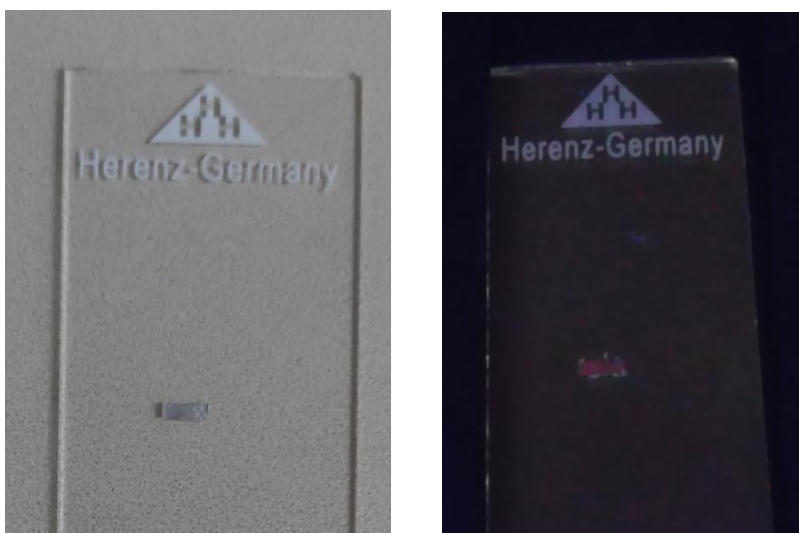

**Figure S8:** Right: the **Eu2**/InGaN chip device under a UV lamp.

## Comments on Checkcif alerts

### Eu1

#### Alert level A

PLAT971\_ALERT\_2\_A Check Calcd Resid. Dens. 0.67 Ang From Eu1... 4.12 eA<sup>-3</sup>

PLAT973\_ALERT\_2\_A Check Calcd Positive Resid. Density on Eu1... 2.44 eA<sup>-3</sup>

**Response:** The high residual densities could be caused by un-efficient absorption corrections.

#### Alert level B

PLAT112\_ALERT\_2\_B ADDSYM Detects New (Pseudo) Symm. Elem. m 100 %Fit

PLAT112\_ALERT\_2\_B ADDSYM Detects New (Pseudo) Symm. Elem. n 100 %Fit

PLAT113\_ALERT\_2\_B ADDSYM Suggests Possible Pseudo/New Space Group Pnma Check

**Response:** The ADDSYM alert is false. The structure could not be solved in Pnma.

PLAT213\_ALERT\_2\_B Atom C6 has ADP max/min Ratio ..... 4.6 prolat

PLAT306\_ALERT\_2\_B Isolated Oxygen Atom (H-atoms Missing ?) ..... O1W Check

PLAT306\_ALERT\_2\_B Isolated Oxygen Atom (H-atoms Missing ?) ..... O2W Check

**Response:** Hydrogen atoms to water molecules were not added to keep the refinement stable.

PLAT430\_ALERT\_2\_B Short Inter D...A Contact O1W ..O7 . 2.78 Ang. x,1/2-y,-1/2+z = 4\_565 Check

PLAT430\_ALERT\_2\_B Short Inter D...A Contact O2W ..O5 . 2.78 Ang. x,y,z = 1\_555 Check

**Response:** The water molecules coordinating to the Eu(III) centre are disordered by two positions.

PLAT934\_ALERT\_3\_B Number of (Iobs-Icalc)/Sigma(W) > 10 Outliers .. 4 Check

**Response:**

PLAT971\_ALERT\_2\_B Check Calcd Resid. Dens. 0.73Ang From Eu1 3.46 eA<sup>-3</sup>

PLAT971\_ALERT\_2\_B Check Calcd Resid. Dens. 0.98Ang From O10 2.96 eA<sup>-3</sup>

PLAT976\_ALERT\_2\_B Check Calcd Resid. Dens. 0.75Ang From O2 . -1.66 eA<sup>-3</sup>

**Response:** The high residual densities could be caused by un-efficient absorption corrections.

### Eu2

#### Alert level B

PLAT201\_ALERT\_2\_B Isotropic non-H Atoms in Main Residue(s) ..... 1 Report

C22B

**Response:** Due to disorder of C22 in TTA units. The atom was refined isotropically.

PLAT220\_ALERT\_2\_B NonSolvent Resd 1 C Ueq(max) / Ueq(min) Range 6.9 Ratio

**Response:** This is unremarkable for the structure where significant disorder in the TTA units.

PLAT230\_ALERT\_2\_B Hirshfeld Test Diff for S1 --C9 . 7.3 s.u.

**Response:** Due to disorder in the fluorine atom in TTA. This does not indicate an incorrect atom-type assignment.
